# Supplementary material for: A phenanthridine-based probe for selective detection of hypochlorite ions
Source: Royal Society of Chemistry journal article supplement (doi:10.1039/d1nj06023f), 2022-01-01
Supplement: d1nj06023f1.pdf [file d1nj06023f1.pdf]

## **Supporting Information**

A phenanthridine-based probe for selective detection of hypochlorite ion

**<sup>a</sup>Saravanan Enbanathan, <sup>a,b</sup> Saravanakumar Manickam, Sathishkumar Munusamy<sup>c</sup>,**

**<sup>a</sup>Dhanapal Jothi, <sup>a</sup>Selin Manoj kumar and Sathiyarayanan Kulathu Iyer<sup>a\*</sup>**

<sup>a</sup>Department of Chemistry, School of Advanced Sciences and Vellore Institute of Technology, Vellore-632 014, India. E-mail: [sathiya\\_kuna@hotmail.com](mailto:sathiya_kuna@hotmail.com)

<sup>b</sup>Department of Chemistry, Saveetha School of Engineering, Saveetha Institute of Medical and Technical Sciences (SIMATS), Chennai-602 105, Tamil Nadu and India.

<sup>c</sup>Institute of chemical biology and nanomedicine, State key laboratory of chemo/Bio-sensing and Chemometrics, College of Chemistry and Chemical Engineering, Hunan University, Changsha 410082, P.R. China. E-mail: [pra3sat@gmail.com](mailto:pra3sat@gmail.com)

## **Table of contents**

**SI Figure S1** <sup>1</sup>H NMR spectra of **PBC**

**SI Figure S2** <sup>13</sup>C NMR spectra of **PBC**

**SI Figure S3** <sup>1</sup>H NMR spectra of **PBO**

**SI Figure S4** <sup>13</sup>C NMR spectra of **PBO**

**SI Figure S5** HRMS spectra of **PBO**

**SI Figure S6** Emission spectrum of **PBO** with OCl<sup>-</sup> ion

**SI Figure S7** HPLC based reaction tracking of **PBO** with OCl<sup>-</sup>.

**SI Figure S8** FTIR spectra changes of **PBO** upon the addition of OCl<sup>-</sup> ion

**SI Figure S9** HRMS spectra of **PBO** + OCl<sup>-</sup> ion

**SI Figure S10** Cytotoxicity of **PBO**



**PBO**

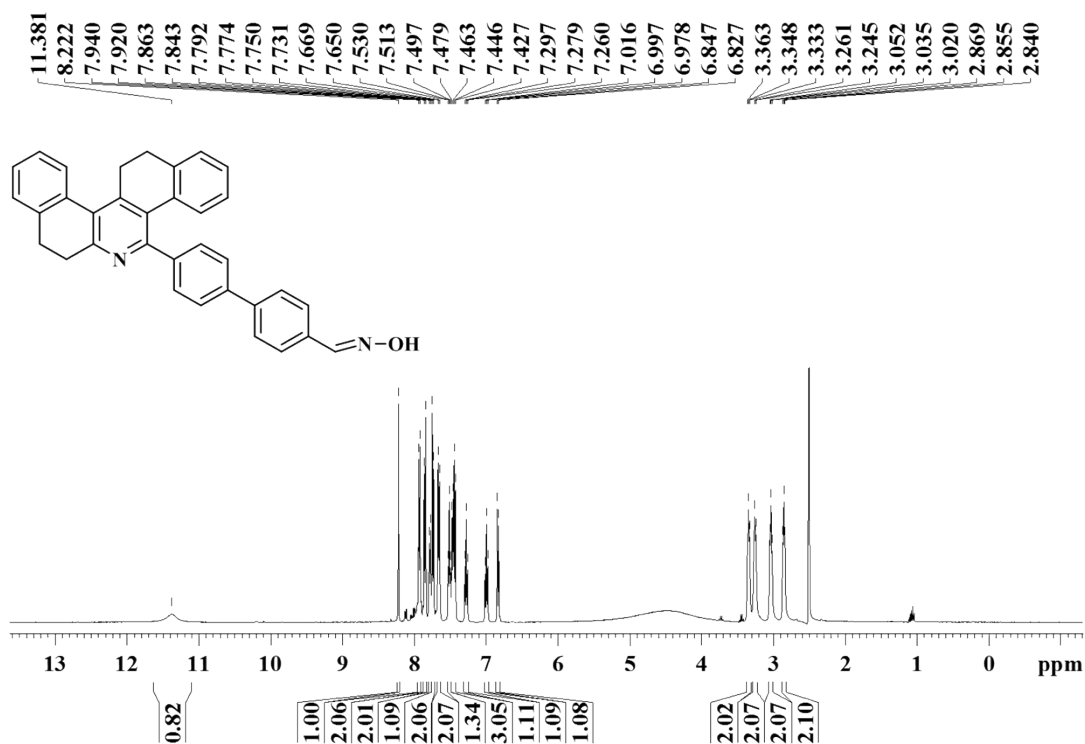

**SI Figure S3** <sup>1</sup>H NMR spectra of PBO

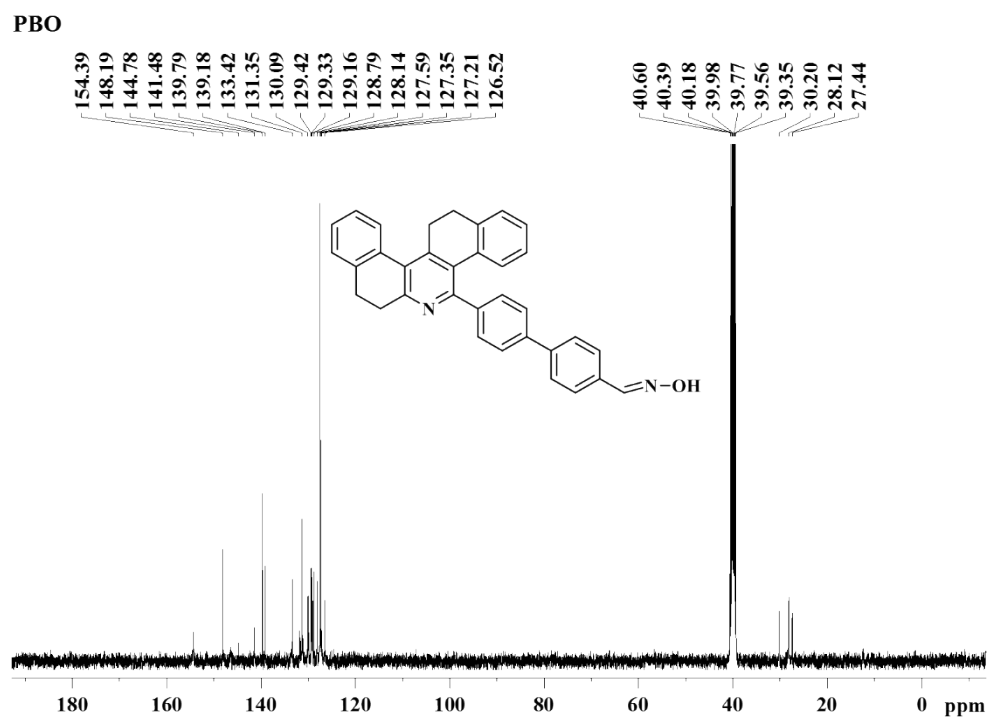

**SI Figure S4** <sup>13</sup>C NMR spectrum of PBO

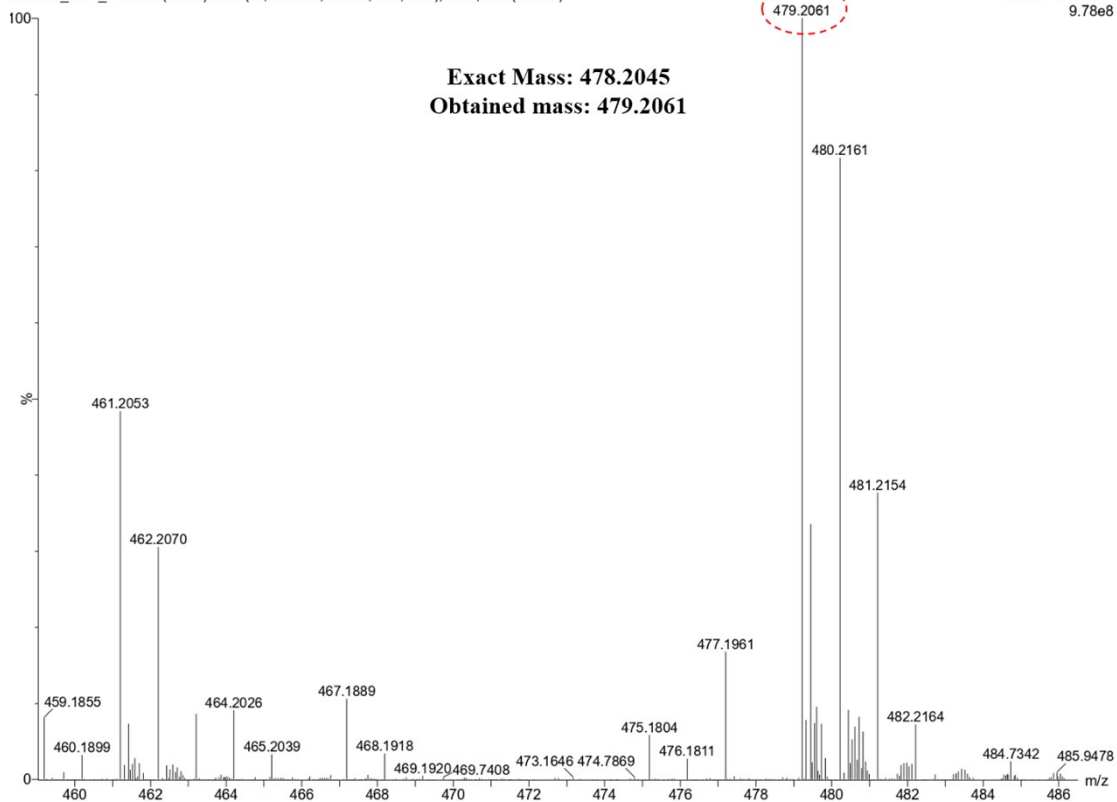

SI Figure S5 HRMS spectra of PBO

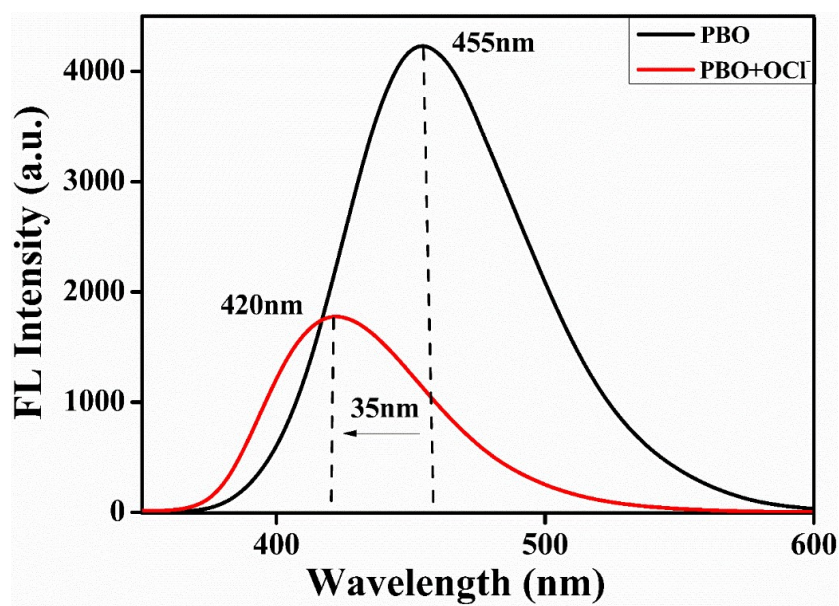SI Figure S6 Emission spectrum of PBO with OCl<sup>-</sup> ion

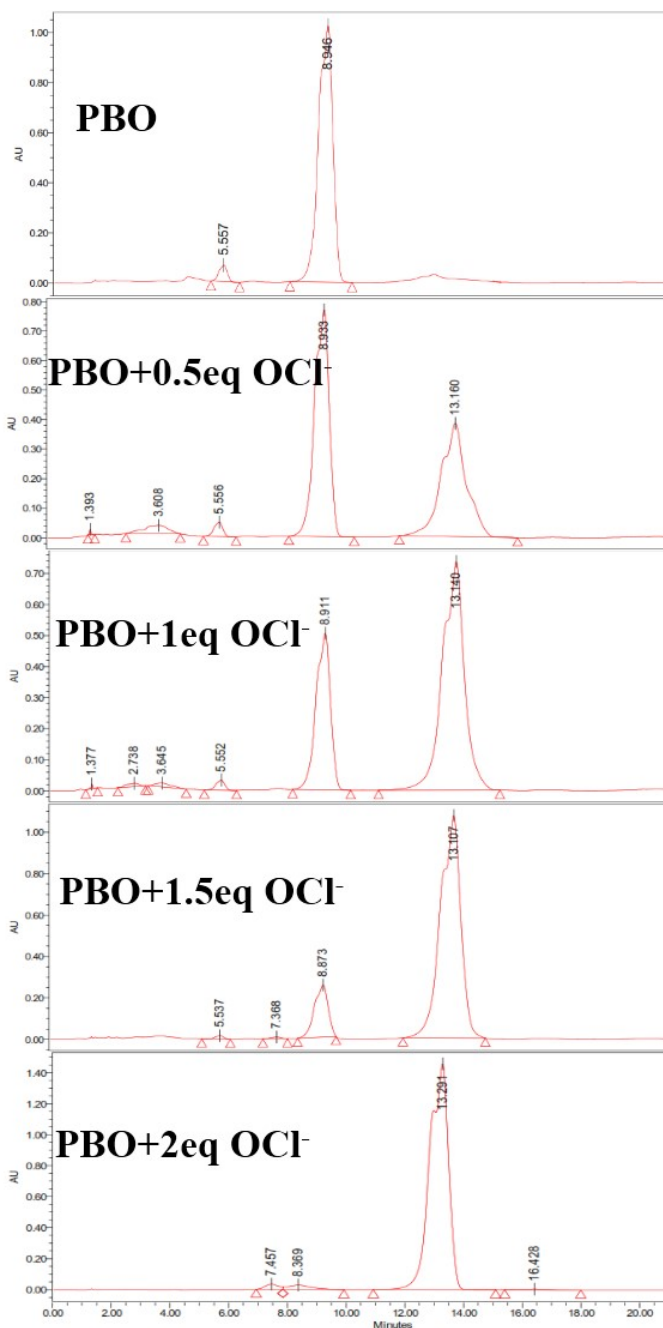

**Peak Results**

| Name | RT    | Area     | Height  | Amount | % Area |
|------|-------|----------|---------|--------|--------|
| 1    | 5.557 | 1219774  | 65671   |        | 3.00   |
| 2    | 8.946 | 33378729 | 1024785 |        | 97.00  |

**Peak Results**

| Name | RT     | Area     | Height | Amount | % Area |
|------|--------|----------|--------|--------|--------|
| 1    | 1.393  | 50819    | 18927  |        | 0.10   |
| 2    | 3.608  | 1551543  | 28301  |        | 3.15   |
| 3    | 5.556  | 970074   | 49451  |        | 1.97   |
| 4    | 8.933  | 25221322 | 768342 |        | 51.16  |
| 5    | 13.160 | 21502574 | 383585 |        | 43.62  |

**Peak Results**

| Name | RT     | Area     | Height | Amount | % Area |
|------|--------|----------|--------|--------|--------|
| 1    | 1.377  | 57760    | 15216  |        | 0.11   |
| 2    | 2.738  | 292135   | 10264  |        | 0.54   |
| 3    | 3.645  | 432525   | 12054  |        | 0.80   |
| 4    | 5.552  | 643639   | 32624  |        | 1.19   |
| 5    | 8.911  | 16396591 | 504798 |        | 30.23  |
| 6    | 13.140 | 36425321 | 736781 |        | 67.15  |

**Peak Results**

| Name | RT     | Area     | Height  | Amount | % Area |
|------|--------|----------|---------|--------|--------|
| 1    | 5.537  | 325992   | 16741   |        | 0.57   |
| 2    | 7.368  | 207309   | 8870    |        | 0.36   |
| 3    | 8.873  | 7715299  | 251162  |        | 13.37  |
| 4    | 13.107 | 49435910 | 1075284 |        | 85.70  |

**Peak Results**

| Name | RT     | Area     | Height  | Amount | % Area |
|------|--------|----------|---------|--------|--------|
| 1    | 7.457  | 1031288  | 33067   |        | 1.52   |
| 2    | 8.369  | 1569166  | 27349   |        | 1.31   |
| 3    | 13.291 | 65094793 | 1455528 |        | 96.78  |
| 4    | 16.428 | 267111   | 5450    |        | 0.39   |

**HPLC method details**

HPLC model = Acquity – H class UPLC

Column = Reverse phase Hypersil C18 - 5mm (particle size) and 150mm length

PDA-detector range 190-600nm

Moblie phase = Isocratic [Acetonitric: H2O (9:1)]

Run time = 20 min

**SI Figure S7** HPLC based reaction tracking of **PBO** with **OCI**.

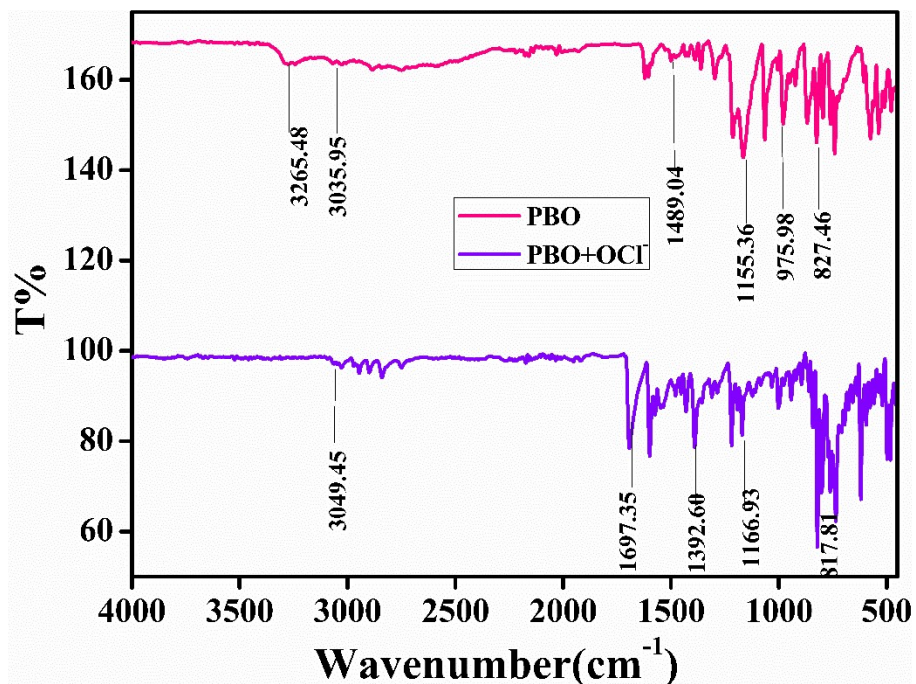

SI Figure S8 FTIR spectra changes of PBO upon the addition of OCl⁻ ion

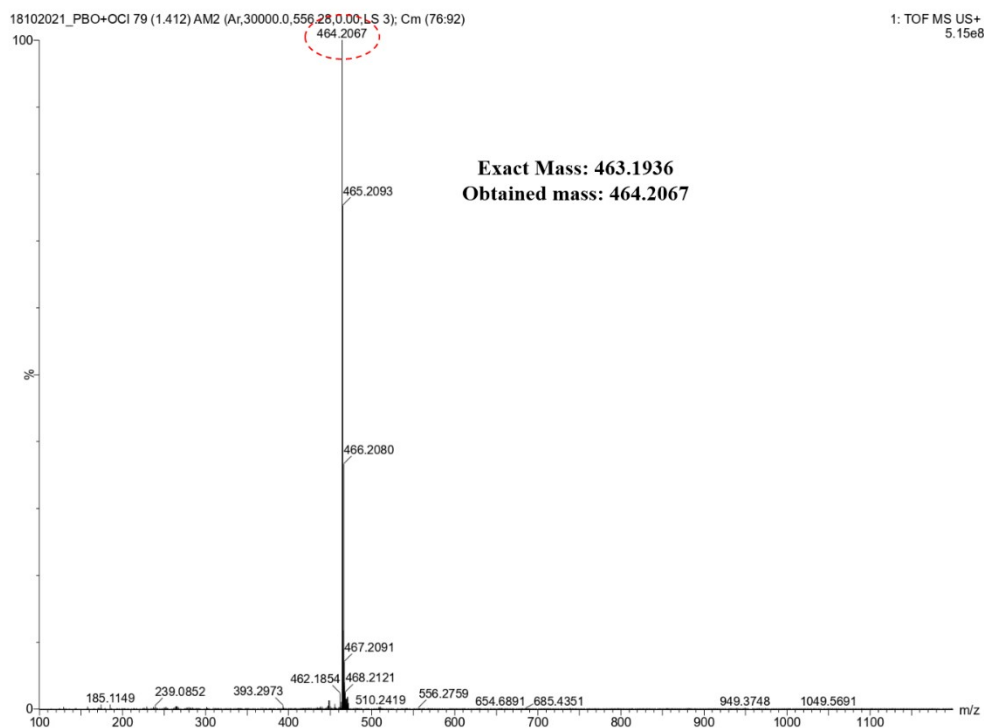

SI Figure S9 HRMS spectra of PBO + OCl⁻ ion

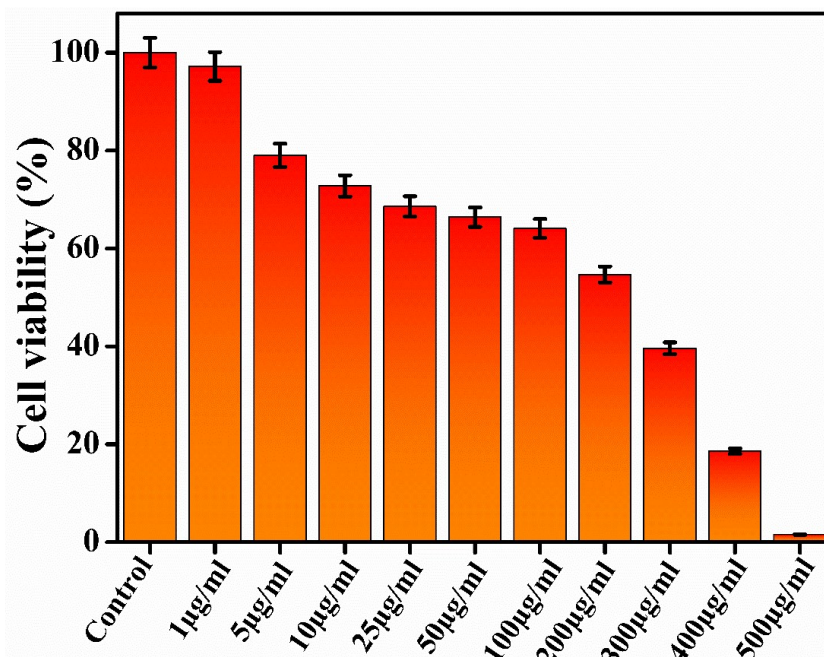

SI Figure S10 Cytotoxicity of PBO

SI Table S1 the comparison table of probe **PBO** for detection of  $\text{OCl}^-$  ion in previous and present reports

| Name of the sensor probe                                                            | Solvent/supporter systems                                                   | Method used  | Detection limit | Application  | References                                 |
|-------------------------------------------------------------------------------------|-----------------------------------------------------------------------------|--------------|-----------------|--------------|--------------------------------------------|
| 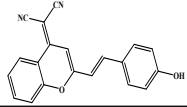 | EtOH: H <sub>2</sub> O ¼ 1:1                                                | Fluorescence | 80 nM.          | Cell imaging | Analytica Chimica Acta 1078 (2019) 135e141 |
|  | DMF: PBS (5: 5, V/V]                                                        | Fluorescence | 1.9 µM          | Cell imaging | Sensors and Actuators B 255 (2018) 666–671 |
|  | HOCL (0–30_ M) in PBS buffer (PH 7.4, containing 50% EtOH as a co solvent). | Fluorescence | 0.72 µM         | Cell imaging | Sensors and Actuators B 255 (2018) 963–969 |
|  | PBS buffer (10.0 MM, PH = 7.4) containing 20% EtOH                          | Fluorescence | 1.7 µM          | Cell imaging | Sensors and Actuators B 260 (2018) 146–155 |



|                                                                                     |                                                                                                         |              |                      |              |                                                                          |
|-------------------------------------------------------------------------------------|---------------------------------------------------------------------------------------------------------|--------------|----------------------|--------------|--------------------------------------------------------------------------|
| 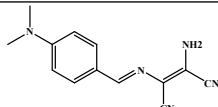   | DMSO–water solution                                                                                     | Fluorescence | 0.5 μM               | Cell imaging | Sensors and Actuators B 265 (2018) 365–370                               |
|    | DMF–PBS buffer (10 mM, pH ¼ 7.4, 1: 1, v/v)                                                             | Fluorescence | 0.58 μM.             | Cell imaging | Anal. Methods, 2017, 9, 864                                              |
|    | DMF/PBS solution (v/v = 3/7, pH = 7.4                                                                   | Fluorescence | 0.136 μM             | Cell imaging | Analyst, 2019, DOI: 10.1039/c9an01981b                                   |
|    | potassium phosphate buffer, pH 9.0/DMF                                                                  | Fluorescence |                      | Cell imaging | Chem. Eur. J. 2009, 15, 2305 – 2309                                      |
|    | 0.1 M Na <sub>2</sub> CO <sub>3</sub> -NaHCO <sub>3</sub> buffer-DMF solution (30:1 v/v, pH = 9.0, rt., | Fluorescence | 5×10 <sup>-5</sup> M | Cell imaging | JFluoresc<br>DOI 10.1007/s10895-015-1734-7                               |
|    | PBS buffer (pH 7.4, 20mM, containing 0.5% DMSO)                                                         | Fluorescence | 0.79μM               | Cell imaging | Sensors and Actuators B: Chemical (2015), doi. 10.1016/j.snb.2015.08.098 |
|  | H3CN–HEPES buffer (Ph =7, v/v=1: 1)                                                                     | Fluorescence |                      | Cell imaging | RSC Adv., 2014,4, 44610–44613<br>DOI: 10.1039/c4ra06435f                 |
|  | DMSO–H <sub>2</sub> O solution (1: 9, v/v, 10 mM HEPES, pH 7.05)                                        | Fluorescence |                      | Cell imaging | Chem. Commun., 2011, 47, 11978–11980 DOI: 10.1039/c1cc15214a             |
|  | Acetonitrile: water 9:1                                                                                 | Fluorescence | 8 nM                 | Cell imaging | Present work                                                             |



**SI Table S2 HOMO, LUMO energy level of PBO and PBO+OCl-**

| <b>Fluorophore</b> | <b>Homo(eV)</b> | <b>Lumo(eV)</b> | <b>Energy gap(<math>\Delta E</math>)</b> |
|--------------------|-----------------|-----------------|------------------------------------------|
| <b>PBO</b>         | 4.60            | 1.91            | 2.69                                     |
| <b>PBO+OCl-</b>    | 6.03            | 2.40            | 3.63                                     |

**SI Table S3 Cell viability (%) (in triplicates) of PBO.**

| <b>S. No</b> | <b>Tested sample concentration (<math>\mu\text{g/ml}</math>)</b> | <b>Cell viability (%) (in triplicates)</b> |         |         | <b>Mean Value (%)</b> |
|--------------|------------------------------------------------------------------|--------------------------------------------|---------|---------|-----------------------|
| 1.           | Control                                                          | 100                                        | 100     | 100     | 100                   |
| 2.           | 500 $\mu\text{g/ml}$                                             | 1.74129                                    | 1.64884 | 1.31485 | 1.5683297             |
| 3.           | 400 $\mu\text{g/ml}$                                             | 18.2587                                    | 20.6774 | 16.8443 | 18.593473             |
| 4.           | 300 $\mu\text{g/ml}$                                             | 39.1045                                    | 42.9144 | 36.8515 | 39.623458             |
| 5.           | 200 $\mu\text{g/ml}$                                             | 54.6269                                    | 57.9323 | 51.4925 | 54.683889             |
| 6.           | 100 $\mu\text{g/ml}$                                             | 72.9353                                    | 65.6417 | 53.6958 | 64.090947             |
| 7.           | 50 $\mu\text{g/ml}$                                              | 75.5224                                    | 68.6275 | 55.0107 | 66.386833             |
| 8.           | 25 $\mu\text{g/ml}$                                              | 77.6119                                    | 70.7665 | 57.3916 | 68.590014             |
| 9.           | 10 $\mu\text{g/ml}$                                              | 81.0945                                    | 75.5348 | 61.7271 | 72.785455             |
| 10.          | 5 $\mu\text{g/ml}$                                               | 87.6119                                    | 80.8378 | 68.6567 | 79.035482             |
| 11.          | 1 $\mu\text{g/ml}$                                               | 97.6119                                    | 101.604 | 92.3241 | 97.180104             |
